# Supplementary material for: Sustained release of inhibitor from bionic scaffolds for wound healing and functional regeneration
Source: Royal Society of Chemistry journal article supplement (doi:10.1039/d0bm00929f), 2020-01-01
Supplement: d0bm00929f1.pdf [file d0bm00929f1.pdf]

## Supporting Information

### **Sustained Release of Inhibitor from Bionic Scaffolds for Promoting Wound Healing and Functional Regeneration**

Jifang Yuan<sup>a,b,c,f#</sup>, Qian Hou<sup>a,b,c#</sup>, Lingzhi Zhong<sup>a,b,c</sup>, Xin Dai<sup>f</sup>, Qiang Lu<sup>e,g,h\*</sup>, Meirong Li<sup>a,b,c,d\*</sup> and Xiaobing Fu<sup>a,b,c\*</sup>

<sup>a</sup>Research Center for Tissue Repair and Regeneration affiliated to the Medical Innovation Research Department and 4th Medical Center, PLA General Hospital and PLA Medical College

<sup>b</sup>PLA Key Laboratory of Tissue Repair and Regenerative Medicine and Beijing Key Research Laboratory of Skin Injury, Repair and Regeneration

<sup>c</sup>Research Unit of Trauma Care, Tissue Repair and Regeneration, Chinese Academy of Medical Sciences 2019RU051

<sup>d</sup>Central Laboratory, Trauma Treatment Center, Central Laboratory, Chinese PLA General Hospital, Hainan Hospital, Sanya, China

<sup>e</sup>National Engineering Laboratory for Modern Silk & Collaborative Innovation Center of Suzhou Nano Science and Technology, Soochow University, Suzhou 215123, P. R. China

<sup>f</sup>Laboratory Animal Center, Chinese PLA General Hospital, Beijing 100853, P. R. China.

<sup>g</sup>Engineering Research Center of the Ministry of Education for Wound Repair Technology, Jiangnan University, Wuxi 214041, P. R. China

<sup>h</sup>Department of Burns and Plastic Surgery, The Affiliated Hospital of Jiangnan University, Wuxi 214041, P. R. China

\*Correspondence to: Xiaobing Fu, fuxiaobing@vip.sina.com; Meirong Li meirong811225@126.com; Qiang Lu, lvqiang78@suda.edu.cn

The supporting information has 3 pages and contains 2 figures.

Supplemant figures and figure legends.

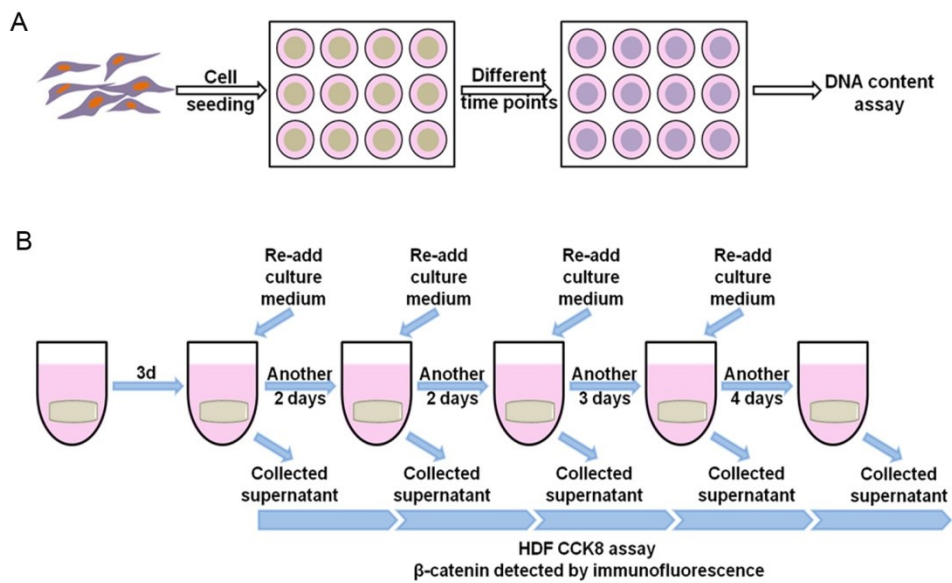

Supplemant figure 1. This is the experimental schema of this study.

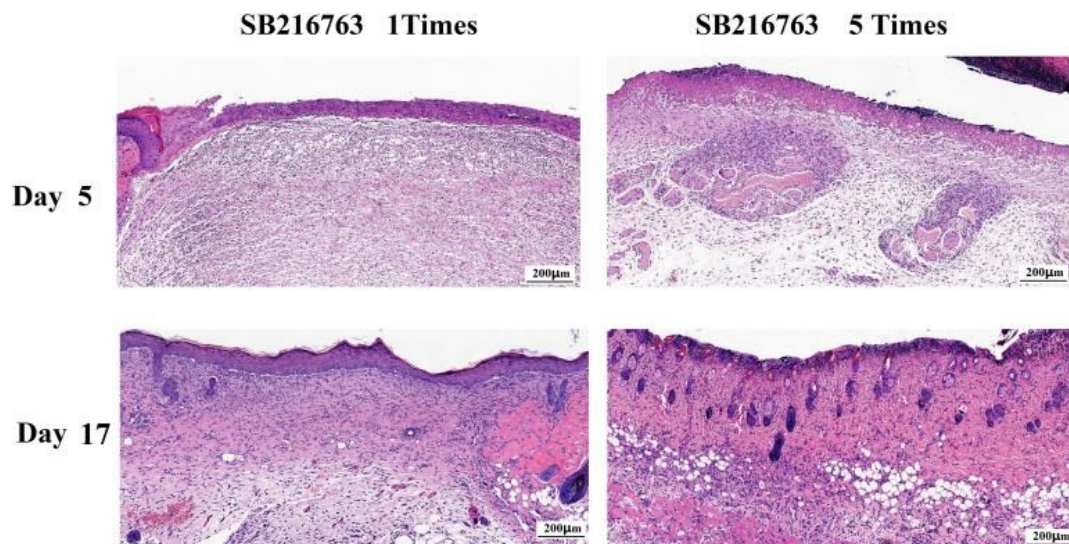

Supplement figure 2. HE staining of cutaneous wound-healed tissues in the SB216763 direct injection group.
